# Detection of porcine enteric viruses (Kobuvirus, Mamastrovirus and Sapelovirus) in domestic pigs in Corsica, France

**Authors:** Lisandru Capai<sup>1\*</sup>, Géraldine Piorkowski<sup>2</sup>, Oscar Maestrini<sup>3</sup>, François Casabianca<sup>3</sup>, Shirley Masse<sup>1</sup>, Xavier de Lamballerie<sup>2</sup>, Rémi N. Charrel<sup>2</sup>, Alessandra Falchi<sup>1\*</sup>.

## **Author's institutional affiliations:**

1 UR 7310, Laboratoire de Virologie, Université de Corse, 20250, Corte, France.

2 Unité des Virus Émergents (UVE: Aix-Marseille Univ-IRD 190-Inserm 1207), 13005, Marseille, France

3 Laboratoire de Recherche sur le Développement de l'Élevage (LRDE), Institut National de Recherche pour l'Agriculture, l'Alimentation et l'Environnement (INRAE), 20250, Corte, France.

**\*Correspondence:** capai\_l@univ-corse.fr (L.C.); falchi@univ-corse.fr (A.F.); Tel.: +33-495-450-155 (L.C.). Laboratoire de Virologie, UR7310 BIOSCOPE, Campus Grimaldi, Bat PPDB RDC, Université de Corse, 20250 Corte, France (L.C. and A.F.).

**Official email addresses of all authors:** L.C. [capai\\_l@univ-corse.fr](mailto:capai_l@univ-corse.fr) ; G.P.

[geraldine.piorkowski@inserm.fr](mailto:geraldine.piorkowski@inserm.fr) ; O.M. [oscar.maestrini@inrae.fr](mailto:oscar.maestrini@inrae.fr) ; F.C.

[francois.casabianca@inrae.fr](mailto:francois.casabianca@inrae.fr) ; S.M. [masse\\_s@univ-corse.fr](mailto:masse_s@univ-corse.fr) ; X.L. [\[lamballerie@univ-amu.fr\]\(mailto:lamballerie@univ-amu.fr\) ; R.N.C \[remi.charrel@univ-amu.fr\]\(mailto:remi.charrel@univ-amu.fr\) ; A.F. \[falchi\\\_a@univ-corse.fr\]\(mailto:falchi\_a@univ-corse.fr\)](mailto:xavier.de-</a></p></div><div data-bbox=)

## **Acknowledgments**

The authors are grateful to all breeders for their participation in the study. Part of this study was funded by the territorial collectivity of Corsica (CDC) and the National Institute of Health and Medical Research (INSERM). The Hepatitis E Virus project of UR BIOSCOPE was also financed by the CDC.

## **Conflict of interest**

The authors declare that they have no conflict of interest.

## 27 Ethical approval

28           The study was exempt from authorization because the molecular analysis was carried  
29 out on stool samples collected by technicians from live pigs (or from the ground). All the  
30 breeders gave their explicit agreement for the collection of the samples, and all the data were  
31 anonymized.

## 32 Abstract

33           Many enteric viruses are found in pig farms around the world and can cause death of  
34 animals or important production losses for breeders. Among the wide spectrum of enteric  
35 viral species, porcine Sapelovirus (PSV), porcine Kobuvirus (PKoV) and porcine Astrovirus  
36 (PAstV) are frequently found in pig feces. In this study we investigated sixteen pig farms in  
37 Corsica, France, to evaluate the circulation of three enteric viruses (PKoV, PAstV-1 and  
38 PSV). In addition to the three viruses studied by RT-qPCR (908 pig feces samples), 26 stool  
39 samples were tested using the Next Generation Sequencing method (NGS). Our results  
40 showed viral RNA detection rates (i) of 62.0% [58.7–65.1] (n = 563/908) for PSV, (ii) of  
41 44.8% [41.5–48.1] (n = 407/908) for PKoV and (iii) of 8.6% [6.8–10.6] (n = 78/908) for  
42 PAstV-1. Significant differences were observed for all three viruses according to age (P-value  
43 = 2.4e–13 for PAstV-1; 2.4e–12 for PKoV and 0.005 for PSV). The type of breeding was  
44 significantly associated with RNA detection only for PAstV-1 (P-value = 9.6e–6). Among the  
45 26 samples tested with NGS method, consensus sequences corresponding to 10 different  
46 species of virus were obtained This study provides first insight on the presence of three  
47 common porcine enteric viruses in France. We also showed that they are frequently  
48 encountered in pigs born and bred in Corsica, which demonstrates endemic local circulation.

49 Key words: Enteric viruses; epidemiology; domestic pigs; virology; molecular biology

50 Importance : This study provides important information in the comprehension of the  
51 epidemiology of different viruses circulating in swine farms. We have shown the great  
52 diversity of viruses that could be present in extensive farms. Moreover, to our knowledge, this  
53 is the first detection of these different viruses in France. So far, this study has to be considered  
54 as a first step in the study of enteric viruses in Corsican pig farms.

55

56

## 57 Introduction

58 Pig farms make an important contribution to the economy of world agriculture and are  
59 an important source of food. Porcine diarrhea can cause mortality in animals, especially in  
60 piglets, and cause economic losses to the pig farmers; many of the pathogens responsible can  
61 also infect humans. A very broad spectrum of viruses that can cause porcine diarrhea has been  
62 found in pig feces, including porcine Sapelovirus (PSV), porcine Kobuvirus (PKoV), porcine  
63 Sapovirus, porcine Astrovirus (PAstV), porcine Bocavirus and porcine Rotavirus (Estes *et al.*,  
64 1983 ; Reuter *et al.*, 2008 ; Shan *et al.*, 2011a ; Liu *et al.*, 2012 ; Meng, 2012 ; Yu *et al.*, 2013  
65 ; Zhang *et al.*, 2014). The most prevalent viruses detected in pig feces are PKoV,  
66 Mamastroviruses or Astrovirus 4 (PAstV), porcine Circovirus (PCV) and PSV (Zhou *et al.*,  
67 2016 ; Chen *et al.*, 2018).

68 Kobuviruses belong to the *Picornaviridae* family. The genome is a single-stranded  
69 8.2-8.3-kb RNA molecule that contains a large open reading frame coding for a polyprotein  
70 (Reuter *et al.*, 2009 ; Yu *et al.*, 2011). Different species of kobuviruses have been found  
71 around the world in diverse animal species (pigs, cattle, sheep, goats, bats, rodents, felines,  
72 canines, etc.) and humans. It is suspected to be a pathogen that causes digestive disorders,  
73 particularly diarrhea in humans and animals, with transmission occurring via the fecal–oral  
74 route (Khamrin *et al.*, 2014).

75 Porcine Sapelovirus (Family *Picornaviridae*, genus *Sapelovirus*) is a non-enveloped  
76 virus of 7.5–8.3 kb positive-polarity single-stranded RNA genome (Krumbholz *et al.*, 2002).  
77 *Sapelovirus* genus is closely related to the genus Enterovirus and consists of three species:  
78 *Avian Sapelovirus*, *Sapelovirus A* (Porcine Sapelovirus [PSV]) and *Sapelovirus B* (simian  
79 Sapelovirus), with a single serotype (ICTV, 2019). PSV is transmitted via the fecal–oral route,  
80 and infection of pigs can be asymptomatic or associated with diarrhea, respiratory distress,  
81 encephalitis, skin lesions and reproductive tract disorders (Lan *et al.*, 2011 ; Kim *et al.*, 2016b  
82 ; Ray *et al.*, 2018). PSV is circulating in China, India, Korea, the United States, Brazil and  
83 Europe (Germany, the United Kingdom and Spain) (Buitrago *et al.*, 2010 ; Lan *et al.*, 2011 ;  
84 Chen *et al.*, 2012 ; Donin *et al.*, 2014 ; Schock *et al.*, 2014 ; Son *et al.*, 2014 ; Arruda *et al.*,  
85 2017 ; Ray *et al.*, 2018). Recently, PSV was detected and characterized for the first time in  
86 France, in Corsica. Importantly, the PSV-infected piglet from which the sequenced strain was  
87 isolated (PSV OPY-1-Corsica-2017; Genbank accession no. MH513612) was born and bred  
88 on the island of Corsica, suggesting local transmission (Piorkowski *et al.*, 2018).

89           Astroviruses are nonenveloped single-stranded RNA viruses with positive polarity,  
90 with an icosahedral capsid (Monroe *et al.*, 1993), that belong to the family *Astroviridae*,  
91 which includes two genera: *Mamastrovirus* (mammals) and *Avastrovirus* (avian) (ICTV,  
92 *Astroviridae*, 2019). Astroviruses can infect a large spectrum of animal species (pigs, deer,  
93 marine mammals, rodents, birds, pets, etc.) as well as humans (Johnson *et al.*, 2017).  
94 Astrovirus infections are generally associated with more or less severe gastrointestinal signs  
95 in mammals (Mendez and Arias, 2007), but have also been detected in healthy individuals  
96 (Reuter *et al.*, 2011). In humans, they cause intestinal disorders, particularly in children and  
97 immunocompromised individuals (Holtz *et al.*, 2011 ; Wylie *et al.*, 2012).

98           The present study was conducted in Corsica, a French Mediterranean island, where  
99 livestock farming is a principal economic activity. In this region, more than 54,000 pigs,  
100 predominantly of the “Nustrale” breed, are bred using a traditional extensive farming system  
101 (Casabianca. F *et al.*, 2000 ; DRAAF., 2017). Traditional extensive (or semi-extensive)  
102 outdoor system of pig farming is the main method of breeding. It favors contact with wild  
103 animals, which could result in sharing of pathogens such as hepatitis E virus (HEV) and  
104 Aujesky’s disease agent (Jori *et al.*, 2016 ; Charrier *et al.*, 2018). For HEV, we recently  
105 reported RNA detection in 9.2% of tested pig stool samples, with 75% of pig farms showing  
106 at least one positive sample (Capai *et al.*, 2019). Exploring the circulation of other enteric  
107 viruses in such pig farms could help to gain knowledge in the epidemiological cycle of HEV  
108 through the possible role of co-infection and super-infection. The aim of our study was to  
109 investigate the circulation of three enteric viruses (PKoV, PAsV-1 and PSV) in samples also  
110 analyzed for HEV.

## 111 [Materials and methods](#)

### 112 [Study area, pig farms and sampling plan](#)

113           Study area, samples/data collection, pig farms sampled, sampling plan and ethics  
114 statement are as described previously (Capai *et al.* 2019).

115           Briefly, **(i)** we collected fresh stool samples individually on the ground where pigs  
116 were pasturing and also intra-rectally using a glove with the help of a qualified technician; **(ii)**  
117 three types of breeding system operated in Corsica were included: seven outdoor extensive  
118 farms (E-farms), six outdoor semi-extensive farms (SE-farms) and three indoor closed farms  
119 (C-farms); **(iii)**. for each stool sample, the township, anonymous breeder code, breeding type,

120 age and breed of pig and nature of the sample (“rectal” or “on the ground” feces) were  
121 recorded; (iv). Four age categories were defined among the young pigs: 1–3 months, 3–4  
122 months, 4–6 months and adults (older than 6 months). Samples from plots where post-  
123 weaning pigs were held together with older pigs (age mixed) were classified as the “Herd”  
124 group.

#### 125 RNA extraction and reverse transcription–quantitative polymerase chain reaction (RT–qPCR)

126 One gram of fecal sample was resuspended in 9 mL of phosphate-buffered saline and  
127 then centrifuged at  $5,000 \times g$  for 10 min. The resulting supernatant was collected and stored at  
128  $-80^{\circ}\text{C}$  until processed. Viral RNA was extracted from 200  $\mu\text{L}$  of supernatant using QIAamp  
129 Cadon Pathogen on a QIAcube HT (Qiagen, Hilden, Germany) according to the  
130 manufacturer’s instructions. Samples were spiked with an internal control (T4 and MS2  
131 phages) before extraction, to monitor the extraction and subsequent steps, as described  
132 previously (Ninove et al., 2011). Nucleic acids were eluted in 100  $\mu\text{L}$  of RE buffer and stored  
133 at  $-80^{\circ}\text{C}$ .

134 Samples initially collected for the detection of HEV RNA were analyzed by RT–qPCR  
135 for PKoV, PSV and PAstV-1. Of the 919 samples initially collected, 908 were available for  
136 this study. Details of the three molecular assay (Kim *et al.*, 2016a ; Zhou *et al.*, 2016) are  
137 presented in Table 1 using an Applied Quant Studio 3 (Applied Biosystems, CA, USA). For  
138 PKoV RNA and PAstV-1 RNA detection, a RT–qPCR test was considered positive if  
139 negative controls were negative, positive controls were positive and an exponential curve was  
140 observed before a 35-Ct threshold.

141 For PSV RNA detection, the qPCR machine was programmed to perform a melt-curve  
142 analysis at the end of the run to ensure assay specificity; RT–qPCR results were considered  
143 positive if a melt curve was detected at between  $83^{\circ}\text{C}$  and  $85^{\circ}\text{C}$  and an amplification curve  
144 was observed before a 35-Ct threshold. The QuantiTect SYBR® Green PCR Kit was used for  
145 this biomolecular detection (Qiagen, Hilden, Germany).

#### 146 Statistical analyses

147 The detection rate of RNA viruses (PKoV, PAstV-1 and PSV) in pig fecal samples  
148 was calculated at the individual level and the pig farm level. Positivity rate was also estimated  
149 in each subgroup, and a two-sided 95% confidence interval [95% CI] was calculated.  
150 Categorical variables were expressed as the number of cases (percentages). Frequencies were

151 compared using the  $\chi^2$  test or Fisher's exact test ( $P < 0.05$ ). A bivariate analysis was carried  
152 out to identify the variables that were related to infection with each virus. The multivariate  
153 logistic regression analysis included variables that were related to outcome variables in the  
154 bivariate analysis with a  $P$ -value  $< 0.2$  or a possible association. Odds ratios (ORs), including  
155 their 95% CIs, were calculated for the logistic regression models. As in Capai *et al.* (2019),  
156 samples with no associated age (Herd group) were excluded from the multivariate analysis,  
157 and previous results for the detection rate of HEV RNA among pig feces were included in the  
158 analysis to estimate a possible association between coinfections with different viruses (Capai  
159 *et al.* 2019). All statistical analyses were performed using the R program ([http://www.r-](http://www.r-project.org)  
160 [project.org](http://www.r-project.org)).

### 161 Virus genome sequencing

162 Virus genome sequencing was performed for 26 stool samples as described previously  
163 (Stang *et al.*, 2005). A random RT-qPCR was performed using tagged random primers. A  
164 ProtoScript® II Reverse Transcriptase kit (New England Biolabs) was used for reverse  
165 transcription with random tagged primers, and Platinum® Taq High Fidelity polymerase  
166 enzyme (Thermo Fisher Scientific) with specific primers for amplification. After Qubit  
167 quantification using Qubit® dsDNA HS Assay Kit and Qubit 2.0 fluorometer (ThermoFisher  
168 Scientific), amplicons were fragmented (sonication) into fragments of 200 bp length. Libraries  
169 were built by adding barcodes for sample identification, and primers for for  
170 amplification using the AB Library Builder System (ThermoFisher Scientific). To pool  
171 equimolar amounts of the barcoded samples, a quantification by quantitative PCR using an  
172 Ion Library TaqMan™ Quantitation Kit (Thermo Fisher Scientific) was performed. An  
173 automated Ion Chef instrument (ThermoFisher) was used for emulsion PCR of the pools and  
174 loading them on a 520 chip. Sequencing was performed using S5 Ion torrent technology  
175 (Thermo Fisher Scientific) following the manufacturer's instructions. Reads were trimmed  
176 (reads with quality score  $< 0.99$  and length  $< 100$  bp were removed, and the 30 first and 30  
177 last nucleotides were removed from the reads), and de novo contigs were produced. These  
178 contigs were submitted to Blastn to determine the best reference sequences(s). A consensus  
179 sequence was obtained after mapping of the reads on the previously determined reference  
180 using CLC genomics workbench software 20.0.4 (Qiagen). The de novo contig was compared  
181 with the consensus sequence to ensure that the reference sequence did not affect the

182 consensus sequence. Only sequences corresponding to enteric viruses found in pigs were  
183 selected for analysis.

184



## 185 Results

186 As suggested by Arya *et al.* (2012), we previously calculated the minimum sample  
187 size required to achieve the objectives related to the HEV (n = 176 stool specimens) (Capai *et*  
188 *al.* 2019). Overall, we collected 919 pig feces samples from 16 pig farms selected according  
189 to location and breeding system.

190 For PSV RNA detection, using the SYBR green A range of temperatures around 84°C  
191 (83–85°C) was tolerated. Indeed, a one-nucleotide difference within the amplified sequence  
192 can impact the melt-curve dissociation temperature (Huang *et al.*, 2011 ; Westerman *et al.*,  
193 2012).

### 194 Viral RNA detection rate for the three viruses in feces from domestic pigs and univariate 195 analysis

196 Our results showed viral RNA detection rates (i) of 62.0% [58.7–65.1] (n = 563/908)  
197 for PSV, (ii) of 44.8% [41.5–48.1] (n = 407/908) for PKoV and (iii) of 8.6% [6.8–10.6] (n =  
198 78/908) for PAstV-1 (Table 2).

199 For PSV and PKoV, there was no statistical association with the type of breeding  
200 system; in contrast, PAstV-1 was detected more frequently in C-farms compared with SE- and  
201 E-farms (P-value = 9.6e–6) (Table 2).

202 Significant differences were observed for all three viruses according to age (P-value =  
203 2.4e–13 for PAstV-1; 2.4e–12 for PKoV and 0.005 for PSV) (Table 2). RNA virus detection  
204 by age group showed a significant decrease in the rate of positive cases after three months for  
205 PAstV-1 (30.6% vs. 6.0%; P-value = 3.87e–7) and between 1 and 3 months (69.4%) and in  
206 adults (28.9%) for PKoV (P-value = 6.37e–12). For PSV, the detection rates by age group  
207 were between 61.0% and 77.5% (Figure 1). However, the positivity rate among pigs under six  
208 months of age was significantly lower than that in pigs older than 6 months (71.4% vs. 61.1%;  
209 P-value = 0.014; OR = 1.59, CI 95% 1.09–2.32).

### 210 Description of coinfections in samples of pig feces

211 Table 3 lists all infections and coinfections detected in pig feces samples. Of the 908  
212 samples tested, 697 samples were positive for at least one virus (76.8%). A total of 344  
213 samples contained at least two distinct viral RNA (37.9%), of which 259 specimens (28.5%)



214 were coinfecting by two viruses, 78 specimens (8.6%) were coinfecting by three viruses and  
215 seven specimens (0.8%) were positive for all four viruses (Table 3).

#### 216 Detection rate of viral RNA at the farm level

217 Table 4 shows the detection rates for each farm. At least one pig was detected positive  
218 for PKoV RNA in each of the 16 pig farms sampled (100%), 62.5% for PAsV-1 infection (n  
219 = 10/16) and 93.8% for PSV infection (n = 15/16). The positivity rate at farm level ranged  
220 between 22.5% and 80.8%, 0.0% and 34.0%, and 0.0% and 87.5% for PKoV, PAsV-1 and  
221 PSV, respectively.

#### 222 Multivariate analysis: associated factors identified for each viral infection

223 A multivariate logistic regression analysis was performed, and the results showed  
224 associations depending on the three viruses (Table 5). A strong association was observed  
225 between PKoV and PSV detection (OR = 3.36 [2.44–4.67]; *P*-value = 9.1e–15). PKoV was  
226 also associated with PAsV-1 codetection (OR = 2.16 [1.29–3.70]; *P*-value = 0.015) and  
227 young pigs under 4 months of age (OR = 3.11 [2.31–4.20]; *P*-value = 4.3e–10). PAsV-1  
228 detection was also associated with age, with pigs over 3 months of age significantly less  
229 frequently infected than younger pigs (OR = 0.18 [0.11–0.29]; *P*-value = 2.8e–9). PSV  
230 infection was not associated with age or type of breeding.

#### 231 Next-generation sequencing (NGS)

232 In addition to the three viruses studied by RT–qPCR, 26 stool samples were tested  
233 using the NGS method. Overall, consensus sequences corresponding to 10 different species of  
234 virus were obtained. PAsVs were detected in ten samples (38.5%), porcine stool/serum-  
235 associated circular virus in six (23.1%), Bocavirus in five (19.2%), Sapelovirus and Posavirus  
236 in four (15.4%), Circovirus in three (11.5%), Pasivirus in two (7.7%) and Rotavirus and  
237 porcine Enterovirus G in one (3.8%). Among these samples, 14 (54%) had consensus  
238 sequences corresponding to at least two different viruses.

239 Porcine astroviruses strains detected among our samples were closed to pig strains  
240 from different countries: Hungary (JQ340310 90.81–92% of homology); United States  
241 (KJ495987 93.36% of homology) and New Zealand (KJ495990 92.8% of homology). The  
242 main astroviruses found, were *Mammastrovirus* 3, *Porcine Astrovirus* 2 and 4. Concerning  
243 Bocaviruses strains detected, homology of 97.08% was determined with pigs from: a  
244 Hungarian domestic pig (KF206167), 95–97.65% with a Chinese pigs (KX017193; KM402139

245 and HM053693), 94.13-96.48% with an American pigs (KF025394 and KF025484) and  
246 95.28% with a Croatian pig (KF206161). Concerning, the sequences obtained for the  
247 Sapelovirus, the strongest homologies were observed when compared with strain MH513612  
248 also isolated in Corsica (92-99.91% of homology) (Piorkowski *et al.*, 2018).

249 For the other results, Table 6 summarizes all the sequences obtained, their length, the  
250 reference sequence to which each corresponds and the percentage of homology with this  
251 sequence.

## 252 Discussion

253 This study investigated the detection rate of three enteric viral infections, PKoV,  
254 Astrovirus-1 and Sapelovirus, in 908 pigs of different ages and breeding systems. To our  
255 knowledge, this work is the first to study factors associated with presence of viral RNA of  
256 PSV, PKoV and PAsV-1 in stools of domestic pigs in France.

### 257 RNA detection rate of the three enteric viruses

258 PSV was the most prevalent (62%) and observed rates are higher than those  
259 described in the US, Brazil and India (7-31%) (Donin *et al.*, 2014 ; Chen *et al.*, 2018 ; Ray *et*  
260 *al.*, 2018). One PSV strain (OPY-1-Corsica-2017) had been previously isolated and  
261 sequenced (GenBank acc. no. MH513612) (Piorkowski *et al.*, 2018). Phylogenetic analysis  
262 shows that OPY-1-Corsica-2017 is closely related to Indian (KY053835) and German  
263 (LT900497, NC\_003987 and AF406813) strains also from pig feces.

264 PKoV RNA was detected in almost half of samples, which is similar to data reported  
265 from pig farms in China (45.7%) (Yang *et al.*, 2014) and Japan (45.4%) (Khamrin *et al.*,  
266 2010). In five European countries, PKoV infections have been described previously as highly  
267 prevalent in both diarrheic and healthy pigs, 54.5% and 58.2%, respectively (Zhou *et al.*,  
268 2016).

269 PAsV-1 RNA was detected in less than 10% of our samples, but comparison is  
270 difficult because other studies were performed at the genus level (*Mamastrovirus*: 52%  
271 positive) (Chen *et al.*, 2018) or for all PAsVs combined (Thailand: 6.5%; MN, USA: 62%;  
272 Slovakia: 93.2%) (Mor *et al.*, 2012 ; Kumthip *et al.*, 2018 ; Salamunova *et al.*, 2018).

### 273 Very early exposure of pigs

274           The analysis of the detection of viral RNA according to pig age showed that for all  
275 viruses tested, pigs < 4 months old were consistently the age group exhibiting the highest rate.  
276 This association between age and rate of infection was confirmed for PKoV and PAstV-1 in  
277 the multivariate analysis. It may correlate with high exposure after weaning (about 2 months  
278 after birth) but also suggest persisting presence of viruses in the breeding environment and  
279 loss of maternal immunity. Piglet passive immunity is derived from colostrum and not from  
280 breastfeeding (Bourne et Curtis, 1973), with a decrease in immunoglobulins A, G and M after  
281 farrowing (Klobasa et Butler, 1987). This trend was also observed during our previous study  
282 of HEV) (Capai *et al.*, 2019). Correlation of decreasing positivity rates and increasing age of  
283 pigs is described for Kobuviruses in Italy (Di Profio *et al.*, 2013) and East Africa (Amimo *et*  
284 *al.*, 2014). A higher PKoV detection rate in young piglets has also been reported in other  
285 studies (Reuter *et al.*, 2009 ; Park *et al.*, 2010 ; Barry *et al.*, 2011). However, the kinetics of  
286 infection were different in each study and may depend on the organization of each farm and  
287 other environmental characteristics

288           In traditional Corsican farms, the average slaughter age is higher (12-18 months)  
289 compared with industrial farms. Therefore, at the time of slaughtering the majority of  
290 *Nustrale* Corsican pigs will have cleared replicative viral infection. The same finding was  
291 already reported for hepatitis E virus (Capai *et al.*, 2019). In contrast, the situation is different  
292 for Sapeloviruses with rates of replicating infection at 60% in adult pigs. Farming type does  
293 not seem to influence the detection rates of studied viruses but still need confirmation from  
294 future studies.

### 295 A potentially very broad spectrum of viruses in pig feces

296           In this study, 37.9% of pigs were coinfecting with at least two different viruses  
297 (including HEV). Strong trends were observed in the multivariate analysis regarding the  
298 associations between different viral infections (PKoV/PSV, PKoV/PAstV-1, PSV/HEV and  
299 PSV/PKoV). This wide variety of viruses in the feces was confirmed with the NGS method,  
300 which showed the presence of other viruses frequently found in pigs: Posavirus, other  
301 Astroviruses, Bocavirus, Enterovirus G, Circovirus, Pasivirus and Rotavirus. Coinfections  
302 were also evidenced in the NGS results, with more than half of the samples containing  
303 consensus sequences corresponding to at least two different viruses. These results are in line  
304 with previous studies reporting multiple coinfections of farmed pigs with porcine enteric

305 viruses (Xiao *et al.*, 2013 ; Zhang *et al.*, 2014), especially in pigs with diarrhea (Shan *et al.*,  
306 2011b ; Sachsenroder *et al.*, 2012 ; Zhang *et al.*, 2013).

307 Our study has several limitations. First, it was not initially designed to study these  
308 three viruses but to determine the prevalence of the HEV in pig farms in Corsica. Differences  
309 in detection could exist depending on criteria such as sampling time and place, age of pigs and  
310 clinical background of the tested animal population (diarrheic or healthy pigs). The lack of  
311 collection of clinical information (diarrhea or other symptoms) for the pigs included may have  
312 led to a bias in the analysis of the data; these data could have been essential for the  
313 improvement of knowledge concerning the studied viruses. The number of viruses studied  
314 could also have been larger to better assess the presence of major enteric viruses in Corsican  
315 pig farms. Finally, the lack of phylogenetic analysis of the different strains found is also a  
316 major limitation of our study. Indeed, the sequences obtained being in very varied zones of  
317 the genome of the various viruses, the phylogenetic analyses could not be realized.

318 In future studies, information about possible symptoms in pigs should be collected. It  
319 would also be useful to evaluate the phylogeny of the different strains found and to set up an  
320 RT-qPCR primer system to distinguish the different strains of Sapelovirus. Moreover, in view  
321 of the large variety of viruses present in the pig feces and the availability of microfluidic PCR  
322 technology, it would be helpful to set up microarrays that can detect all the principal known  
323 porcine enteric viruses. Moreover, the real impact of Kobuvirus, Astroviruses, Sapelovirus  
324 and other enteric viruses on animal health and breeding systems remains largely unknown and  
325 needs further epidemiological studies.

326 In conclusion, this study provides first insight on the presence of three common  
327 porcine enteric viruses in France and showed that they are frequently encountered in Corsica  
328 in pig farms using the traditional extensive breeding. The three viruses studied were found on  
329 almost all the farms, indicating widespread distribution. Moreover, the pigs tested were born  
330 and bred in Corsica, which demonstrates endemic local circulation. Whether such infections  
331 and co-infections can affect the productivity, impact the growth of pigs or cause immune  
332 weakness remains to be established. So far, this study has to be considered as a first step in  
333 the study of enteric viruses in Corsican pig farms.

## 334 References

- 335 **Amimo J. O., E. Okoth, J. O. Junga, W. O. Ogara, M. N. Njahira, Q. Wang, et al.** (2014).  
336 *Molecular detection and genetic characterization of kobuviruses and astroviruses in*  
337 *asymptomatic local pigs in East Africa.* Arch Virol 159(6): 1313-1319.
- 338 **Arruda P. H., B. L. Arruda, K. J. Schwartz, F. Vannucci, T. Resende, A. Rovira, et al.**  
339 (2017). *Detection of a novel sapelovirus in central nervous tissue of pigs with*  
340 *polioencephalomyelitis in the USA.* Transbound Emerg Dis 64(2): 311-315.
- 341 **Arya R., B. Antonisamy and S. Kumar** (2012). *Sample size estimation in prevalence*  
342 *studies.* Indian J Pediatr 79(11): 1482-1488.
- 343 **Barry A. F., J. Ribeiro, A. F. Alfieri, W. H. van der Poel and A. A. Alfieri** (2011). *First*  
344 *detection of kobuvirus in farm animals in Brazil and the Netherlands.* Infect Genet Evol  
345 11(7): 1811-1814.
- 346 **Bourne F. J. and J. Curtis** (1973). *The transfer of immunoglobins IgG, IgA and IgM from*  
347 *serum to colostrum and milk in the sow.* Immunology 24(1): 157-162.
- 348 **Buitrago D., C. Cano-Gomez, M. Agüero, P. Fernandez-Pacheco, C. Gomez-Tejedor and**  
349 **M. A. Jimenez-Clavero** (2010). *A survey of porcine picornaviruses and adenoviruses in fecal*  
350 *samples in Spain.* J Vet Diagn Invest 22(5): 763-766.
- 351 **Capai L., C. F., O. Maestrini, N. Villechenaud, S. Masse, F. Bosseur, et al.** (2019). *Drastic*  
352 *decline of hepatitis E virus detection in domestic pigs after the age of 6 months, Corsica,*  
353 *France.* Transbound Emerg Dis.
- 354 **Casabianca, F., Poggioli, A., Rossi, JD and Maestrini, O** (2000). *The beginning of collective management for*  
355 *the Corsican pig breed. Building up a standard and elaborating the breeders performance recording.* Serie A,  
356 *Seminaires Mediterraneens. O. Mediterraneennes. 41: 23-34.*
- 357 **Charrier F., S. Rossi, F. Jori, O. Maestrini, C. Richomme, F. Casabianca, et al.** (2018).  
358 *Aujeszky's Disease and Hepatitis E Viruses Transmission between Domestic Pigs and Wild*  
359 *Boars in Corsica: Evaluating the Importance of Wild/Domestic Interactions and the Efficacy*  
360 *of Management Measures.* Front Vet Sci 5: 1.
- 361 **Chen J., F. Chen, Q. Zhou, W. Li, Y. Song, Y. Pan, et al.** (2012). *Complete genome*  
362 *sequence of a novel porcine Sapelovirus strain YC2011 isolated from piglets with diarrhea.* J  
363 Virol 86(19): 10898.
- 364 **Chen Q., L. Wang, Y. Zheng, J. Zhang, B. Guo, K. J. Yoon, et al.** (2018). *Metagenomic*  
365 *analysis of the RNA fraction of the fecal virome indicates high diversity in pigs infected by*  
366 *porcine endemic diarrhea virus in the United States.* Virol J 15(1): 95.
- 367 **Di Profio F., C. Ceci, E. Di Felice, F. Marsilio and B. Di Martino** (2013). *Molecular*  
368 *detection of porcine kobuviruses in Italian swine.* Res Vet Sci 95(2): 782-785.
- 369 **Donin D. G., R. de Arruda Leme, A. F. Alfieri, G. C. Alberton and A. A. Alfieri** (2014).  
370 *First report of Porcine teschovirus (PTV), Porcine sapelovirus (PSV) and Enterovirus G (EV-*  
371 *G) in pig herds of Brazil.* Trop Anim Health Prod 46(3): 523-528.
- 372 **DRAAF, D. R. d. I. A. d. I. A. e. d. I. F.** (2017). *Panorama de l'agriculture en Corse.*
- 373 **Estes M. K., E. L. Palmer and J. F. Obijeski** (1983). *Rotaviruses: a review.* Curr Top  
374 Microbiol Immunol 105: 123-184.
- 375 **Holtz L. R., K. M. Wylie, E. Sodergren, Y. Jiang, C. J. Franz, G. M. Weinstock, et al.**  
376 (2011). *Astrovirus MLB2 viremia in febrile child.* Emerg Infect Dis 17(11): 2050-2052.
- 377 **Huang Q., Z. Liu, Y. Liao, X. Chen, Y. Zhang and Q. Li** (2011). *Multiplex fluorescence*  
378 *melting curve analysis for mutation detection with dual-labeled, self-quenched probes.* PLoS  
379 One 6(4): e19206.
- 380 **ICTV I. C. o. T. o. V.** (2019). *Genus: Kobuvirus.* from [https://talk.ictvonline.org/ictv-](https://talk.ictvonline.org/ictv-reports/ictv_online_report/positive-sense-rna-viruses/picornavirales/w/picornaviridae/686/genus-kobuvirus)  
381 [reports/ictv\\_online\\_report/positive-sense-rna-](https://talk.ictvonline.org/ictv-reports/ictv_online_report/positive-sense-rna-viruses/picornavirales/w/picornaviridae/686/genus-kobuvirus)  
382 [viruses/picornavirales/w/picornaviridae/686/genus-kobuvirus.](https://talk.ictvonline.org/ictv-reports/ictv_online_report/positive-sense-rna-viruses/picornavirales/w/picornaviridae/686/genus-kobuvirus)



- 383 **Johnson C., V. Hargest, V. Cortez, V. A. Meliopoulos and S. Schultz-Cherry** (2017).  
384 *Astrovirus Pathogenesis*. *Viruses* 9(1).
- 385 **Jori F., M. Laval, O. Maestrini, F. Casabianca, F. Charrier and N. Pavio** (2016).  
386 *Assessment of Domestic Pigs, Wild Boars and Feral Hybrid Pigs as Reservoirs of Hepatitis E*  
387 *Virus in Corsica, France*. *Viruses* 8(8).
- 388 **Khamrin P., N. Maneekarn, S. Hidaka, S. Kishikawa, K. Ushijima, S. Okitsu, et al.**  
389 (2010). *Molecular detection of kobuvirus sequences in stool samples collected from healthy*  
390 *pigs in Japan*. *Infect Genet Evol* 10(7): 950-954.
- 391 **Khamrin P., N. Maneekarn, S. Okitsu and H. Ushijima** (2014). *Epidemiology of human*  
392 *and animal kobuviruses*. *Virusdisease* 25(2): 195-200.
- 393 **Kim D. S., M. I. Kang, K. Y. Son, G. Y. Bak, J. G. Park, M. Hosmillo, et al.** (2016a).  
394 *Pathogenesis of Korean SapelovirusA in piglets and chicks*. *J Gen Virol* 97(10): 2566-2574.
- 395 **Kim D. S., K. Y. Son, K. M. Koo, J. Y. Kim, M. M. Alfajaro, J. G. Park, et al.** (2016b).  
396 *Porcine Sapelovirus Uses alpha2,3-Linked Sialic Acid on GD1a Ganglioside as a Receptor*. *J*  
397 *Virol* 90(8): 4067-4077.
- 398 **Klobasa F. and J. E. Butler** (1987). *Absolute and relative concentrations of*  
399 *immunoglobulins G, M, and A, and albumin in the lacteal secretion of sows of different*  
400 *lactation numbers*. *Am J Vet Res* 48(2): 176-182.
- 401 **Krumbholz A., M. Dauber, A. Henke, E. Birch-Hirschfeld, N. J. Knowles, A. Stelzner, et**  
402 **al.** (2002). *Sequencing of porcine enterovirus groups II and III reveals unique features of both*  
403 *virus groups*. *J Virol* 76(11): 5813-5821.
- 404 **Kumthip K., P. Khamrin, W. Saikruang, A. Kongkaew, R. Vachirachewin, H. Ushijima,**  
405 **et al.** (2018). *Detection and genetic characterization of porcine astroviruses in piglets with*  
406 *and without diarrhea in Thailand*. *Arch Virol* 163(7): 1823-1829.
- 407 **Lan D., W. Ji, S. Yang, L. Cui, Z. Yang, C. Yuan, et al.** (2011). *Isolation and*  
408 *characterization of the first Chinese porcine sapelovirus strain*. *Arch Virol* 156(9): 1567-  
409 1574.
- 410 **Liu G. H., R. C. Li, Z. B. Huang, J. Yang, C. T. Xiao, J. Li, et al.** (2012). *RT-PCR test for*  
411 *detecting porcine sapovirus in weanling piglets in Hunan Province, China*. *Trop Anim Health*  
412 *Prod* 44(7): 1335-1339.
- 413 **Meng X. J.** (2012). *Emerging and re-emerging swine viruses*. *Transbound Emerg Dis* 59  
414 Suppl 1: 85-102.
- 415 **Monroe S. S., B. Jiang, S. E. Stine, M. Koopmans and R. I. Glass** (1993). *Subgenomic*  
416 *RNA sequence of human astrovirus supports classification of Astroviridae as a new family of*  
417 *RNA viruses*. *J Virol* 67(6): 3611-3614.
- 418 **Mor S. K., Y. Chander, D. Marthaler, D. P. Patnayak and S. M. Goyal** (2012). *Detection*  
419 *and molecular characterization of Porcine astrovirus strains associated with swine diarrhea*.  
420 *J Vet Diagn Invest* 24(6): 1064-1067.
- 421 **Park S. J., H. K. Kim, H. J. Moon, D. S. Song, S. M. Rho, J. Y. Han, et al.** (2010).  
422 *Molecular detection of porcine kobuviruses in pigs in Korea and their association with*  
423 *diarrhea*. *Arch Virol* 155(11): 1803-1811.
- 424 **Piorkowski G., L. Capai, A. Falchi, F. Casabianca, O. Maestrini, P. Gallian, et al.** (2018).  
425 *First Identification and Genomic Characterization of a Porcine Sapelovirus from Corsica,*  
426 *France, 2017*. *Microbiol Resour Announc* 7(11).
- 427 **Ray P. K., P. A. Desingu, S. Kumari, J. K. John, M. Sethi, G. K. Sharma, et al.** (2018).  
428 *Porcine sapelovirus among diarrhoeic piglets in India*. *Transbound Emerg Dis* 65(1): 261-  
429 263.
- 430 **Reuter G., A. Boldizar, I. Kiss and P. Pankovics** (2008). *Candidate new species of*  
431 *Kobuvirus in porcine hosts*. *Emerg Infect Dis* 14(12): 1968-1970.

- 432 **Reuter G., A. Boldizar and P. Pankovics** (2009). *Complete nucleotide and amino acid*  
433 *sequences and genetic organization of porcine kobuvirus, a member of a new species in the*  
434 *genus Kobuvirus, family Picornaviridae.* Arch Virol 154(1): 101-108.
- 435 **Reuter G., P. Pankovics and A. Boros** (2011). *Identification of a novel astrovirus in a*  
436 *domestic pig in Hungary.* Arch Virol 156(1): 125-128.
- 437 **Sachsenroder J., S. Twardziok, J. A. Hammerl, P. Janczyk, P. Wrede, S. Hertwig, et al.**  
438 (2012). *Simultaneous identification of DNA and RNA viruses present in pig faeces using*  
439 *process-controlled deep sequencing.* PLoS One 7(4): e34631.
- 440 **Salamunova S., A. Jackova, R. Mandelik, J. Novotny, M. Vlasakova and S. Vilcek**  
441 (2018). *Molecular detection of enteric viruses and the genetic characterization of porcine*  
442 *astroviruses and sapoviruses in domestic pigs from Slovakian farms.* BMC Vet Res 14(1):  
443 313.
- 444 **Schock A., R. Gurralla, H. Fuller, L. Foyle, M. Dauber, F. Martelli, et al.** (2014).  
445 *Investigation into an outbreak of encephalomyelitis caused by a neuroinvasive porcine*  
446 *sapelovirus in the United Kingdom.* Vet Microbiol 172(3-4): 381-389.
- 447 **Shan T., D. Lan, L. Li, C. Wang, L. Cui, W. Zhang, et al.** (2011a). *Genomic*  
448 *characterization and high prevalence of bocaviruses in swine.* PLoS One 6(4): e17292.
- 449 **Shan T., L. Li, P. Simmonds, C. Wang, A. Moeser and E. Delwart** (2011b). *The fecal*  
450 *virome of pigs on a high-density farm.* J Virol 85(22): 11697-11708.
- 451 **Son K. Y., D. S. Kim, J. Kwon, J. S. Choi, M. I. Kang, G. J. Belsham, et al.** (2014). *Full-*  
452 *length genomic analysis of Korean porcine Sapelovirus strains.* PLoS One 9(9): e107860.
- 453 **Stang A., K. Korn, O. Wildner and K. Uberla** (2005). *Characterization of virus isolates by*  
454 *particle-associated nucleic acid PCR.* J Clin Microbiol 43(2): 716-720.
- 455 **Westerman L. J., H. V. Stel, M. E. Schipper, L. J. Bakker, E. A. Neefjes-Borst, J. H. van**  
456 **den Brande, et al.** (2012). *Development of a real-time PCR for identification of brachyspira*  
457 *species in human colonic biopsies.* PLoS One 7(12): e52281.
- 458 **Wylie K. M., K. A. Mihindukulasuriya, E. Sodergren, G. M. Weinstock and G. A. Storch**  
459 (2012). *Sequence analysis of the human virome in febrile and afebrile children.* PLoS One  
460 7(6): e27735.
- 461 **Xiao C. T., L. G. Gimenez-Lirola, P. F. Gerber, Y. H. Jiang, P. G. Halbur and T.**  
462 **Opriessnig** (2013). *Identification and characterization of novel porcine astroviruses (PAstVs)*  
463 *with high prevalence and frequent co-infection of individual pigs with multiple PAstV types.* J  
464 Gen Virol 94(Pt 3): 570-582.
- 465 **Yang Z., W. Jin, Z. Zhao, W. Lin, D. Zhang, E. Yu, et al.** (2014). *Genetic characterization*  
466 *of porcine kobuvirus and detection of coinfecting pathogens in diarrheic pigs in Jiangsu*  
467 *Province, China.* Arch Virol 159(12): 3407-3412.
- 468 **Yu J. M., X. Y. Li, Y. Y. Ao, L. L. Li, N. Liu, J. S. Li, et al.** (2013). *Identification of a novel*  
469 *picornavirus in healthy piglets and seroepidemiological evidence of its presence in humans.*  
470 PLoS One 8(8): e70137.
- 471 **Yu J. M., Z. Q. Xu, B. W. Li, Q. Zhang, S. X. Cui, M. Jin, et al.** (2011). *Analysis and*  
472 *characterization of the complete genome of a member of a new species of kobuvirus*  
473 *associated with swine.* Arch Virol 156(5): 747-751.
- 474 **Zhang B., C. Tang, H. Yue, Y. Ren and Z. Song** (2014). *Viral metagenomics analysis*  
475 *demonstrates the diversity of viral flora in piglet diarrhoeic faeces in China.* J Gen Virol  
476 95(Pt 7): 1603-1611.
- 477 **Zhang Q., R. Hu, X. Tang, C. Wu, Q. He, Z. Zhao, et al.** (2013). *Occurrence and*  
478 *investigation of enteric viral infections in pigs with diarrhea in China.* Arch Virol 158(8):  
479 1631-1636.



480 **Zhou W., K. Ullman, V. Chowdry, M. Reining, Z. Benyeda, C. Baule, et al.** (2016).  
481 *Molecular investigations on the prevalence and viral load of enteric viruses in pigs from five*  
482 *European countries.* Vet Microbiol 182: 75-81.

483

484

485

**Table 1: RT-qPCR detection assays used in the study**

| <b>Viruses</b> | <b>Name of primers and probes</b>                                     | <b>Sequences</b>                                                           | <b>References</b>           |
|----------------|-----------------------------------------------------------------------|----------------------------------------------------------------------------|-----------------------------|
| <b>PSV</b>     | FW: SYBR-PSV1 primer<br>REV: SYBR-PSV2 primer                         | GGCAGTAGCGTGGCGAGC<br>CTACTCTCCTGTAACCAGT                                  | (Kim <i>et al.</i> , 2016)  |
| <b>PKoV</b>    | FW: T-248-F-PKoV<br>REV: T-249-R-PKoV<br>Probe: T-250-PKoV-FAM        | TCTCTGACCTCTGAAGTGCACT<br>TGAAGAAGCCATGTGTCTTGTC<br>GGTTGCGTGGCTGGGAATCCAC | (Zhou <i>et al.</i> , 2016) |
| <b>PAstV-1</b> | FW: T217-F-PAstV-1<br>REV: T218-R-PAstV-1<br>Probe: T-219-PAstV-1-VIC | CCAAAACCAGCAATCCGTCAA<br>GCCCCTAAAGCAACGATCGG<br>TTCTTGTCAAGGATAATACGGGG   |                             |

**Table 2: Viral RNA in stools of domestic pigs stratified by breeding system and age**

| Factor           | Condition           | Number of samples |              | positive (n) | PKoV RNA detection (%) |                    | P-value | positive (n) | PAstV-1 RNA detection (%) |                   | P-value | positive (n) | PSV RNA detection (%) |                    | P-value |
|------------------|---------------------|-------------------|--------------|--------------|------------------------|--------------------|---------|--------------|---------------------------|-------------------|---------|--------------|-----------------------|--------------------|---------|
|                  |                     | N                 | %            |              | %                      | [95% CI]           |         |              | %                         | [95% CI]          |         |              | %                     | [95% CI]           |         |
| Breeding systems | E-farm              | 310               | 34.1         | 136          | 43.9                   | [38.3–49.6]        | 0.91    | 17           | 5.5                       | [38.3–49.6]       | 9.6e–6  | 186          | 60.0                  | [54.3–65.5]        | 0.0094  |
|                  | SE-farm             | 396               | 43.6         | 180          | 45.5                   | [40.5–50.5]        |         | 27           | 6.8                       | [4.5–9.8]         |         | 233          | 58.8                  | [53.8–63.7]        |         |
|                  | C-farm              | 201               | 22.1         | 91           | 45.3                   | [38.2–52.4]        |         | 34           | 16.9                      | [12–22.8]         |         | 143          | 71.1                  | [64.3–77.3]        |         |
| Age              | 1–3 months          | 111               | 12.2         | 77           | 69.4                   | [59.9–77.7]        | 2.4e–12 | 34           | 30.6                      | [22.2–40.1]       | 2.4e–13 | 86           | 77.5                  | [68.6–84.9]        | 0.005   |
|                  | 3–4 months          | 143               | 15.7         | 84           | 58.7                   | [50.2–66.9]        |         | 9            | 6.3                       | [2.9–11.6]        |         | 91           | 63.6                  | [55.2–71.5]        |         |
|                  | 4–6 months          | 162               | 17.8         | 71           | 43.8                   | [36.0–51.8]        |         | 4            | 2.5                       | [0.7–6.2]         |         | 120          | 74.1                  | [66.6–80.6]        |         |
|                  | Adults (>6 months)* | 190               | 20.9         | 54           | 28.4                   | [22.1–35.4]        |         | 17           | 8.9                       | [5.3–13.9]        |         | 116          | 61.1                  | [53.7–68.0]        |         |
|                  | Herds (age mixed)   | 302               | 33.3         | 121          | 40.1                   | [34.5–45.8]        |         | 14           | 4.6                       | [2.6–7.7]         |         | 150          | 49.7                  | [43.9–55.4]        |         |
| <b>All pigs</b>  |                     | <b>908</b>        | <b>100.0</b> | <b>407</b>   | <b>44.8</b>            | <b>[41.5–48.1]</b> |         | <b>78</b>    | <b>8.6</b>                | <b>[6.8–10.6]</b> |         | <b>563</b>   | <b>62.0</b>           | <b>[58.7–65.1]</b> |         |

\*6–8 months old (n = 47); Sow/Boar (n = 30); at least 6 months old (n = 108)

E-farm: Extensive farm; SE-farm: semi-extensive farm; C-farm: closed farm; Herds: pigs without associated age

**Table 3: Coinfections in pig feces samples**

|                  | N   | Number for each coinfection |              |                  |                 |             |             |
|------------------|-----|-----------------------------|--------------|------------------|-----------------|-------------|-------------|
| No infection     | 211 |                             |              |                  |                 |             |             |
| Single infection | 353 | PKoV                        | PSV          | PAstV-1          | HEV             |             |             |
|                  |     | 102                         | 229          | 9                | 13              |             |             |
| Double infection | 259 | PKoV/PSV                    | PKoV/PAstV-1 | PKoV/HEV         | PSV/HEV         | PAstV-1/PSV | PAstV-1/HEV |
|                  |     | 216                         | 4            | 3                | 21              | 14          | 1           |
| Triple infection | 78  | PKoV/PAstV-1/PSV            | PKoV/HEV/PSV | PKoV/HEV/PAstV-1 | HEV/PAstV-1/PSV |             |             |
|                  |     | 39                          | 35           | 2                | 2               |             |             |
| All four viruses | 7   |                             |              |                  |                 |             |             |

**Table 4: Positivity rates for the three viruses by pig farm**

| No. of pig farms | PKoV |      | PAstV-1 |      | PSV |      | Total |
|------------------|------|------|---------|------|-----|------|-------|
|                  | N    | %    | N       | %    | N   | %    |       |
| 1                | 27   | 65.9 | 0       | 0.0  | 13  | 31.7 | 41    |
| 2                | 28   | 27.2 | 13      | 12.6 | 70  | 68.0 | 103   |
| 3                | 25   | 29.4 | 3       | 3.5  | 56  | 65.9 | 85    |
| 4                | 61   | 48.8 | 3       | 2.4  | 88  | 70.4 | 125   |
| 5                | 25   | 56.8 | 11      | 25.0 | 38  | 86.4 | 44    |
| 6                | 9    | 45.0 | 1       | 5.0  | 9   | 45.0 | 20    |
| 7                | 20   | 22.5 | 1       | 1.1  | 62  | 69.7 | 89    |
| 8                | 10   | 27.8 | 0       | 0.0  | 21  | 58.3 | 36    |
| 9                | 37   | 59.7 | 4       | 6.4  | 41  | 66.1 | 62    |
| 10               | 25   | 41.0 | 9       | 14.8 | 37  | 60.7 | 61    |
| 11               | 13   | 32.5 | 8       | 20.0 | 17  | 42.5 | 40    |
| 12               | 59   | 80.8 | 25      | 34.2 | 65  | 89.0 | 73    |
| 13               | 24   | 55.8 | 0       | 0.0  | 0   | 0.0  | 43    |
| 14               | 32   | 71.1 | 0       | 0.0  | 16  | 35.6 | 45    |
| 15               | 9    | 36.0 | 0       | 0.0  | 16  | 64.0 | 25    |
| 16               | 4    | 25.0 | 0       | 0.0  | 14  | 87.5 | 16    |

**Table 5: Statistical analysis of factors associated with each virus (multivariate logistic regression model with random effect at the farm level).**

| Viruses | Factor      | Condition  | OR   | [95% CI]    | P-value adjusted |
|---------|-------------|------------|------|-------------|------------------|
| PKoV    | Coinfection | PSV        | 3.36 | [2.44–4.67] | 9.1e–15          |
|         | Coinfection | PAstV-1    | 2.16 | [1.29–3.70] | 0.015            |
|         | Age group   | 0–4 months | 3.11 | [2.31–4.20] | 4.3e–10          |
| PAstV-1 | Coinfection | PKoV       | 2.25 | [1.32–3.90] | 0.014            |
|         | Age group   | >3 months  | 0.18 | [0.11–0.29] | 2.8e–9           |
| PSV     | Coinfection | HEV        | 2.01 | [1.17–3.64] | 0.041            |
|         | Coinfection | PKoV       | 2.92 | [2.13–4.04] | 3.7e–8           |

Only factors with *P*-values < 0.05 are included

**Table 6:**

| Samples | Viruses                                 | Sequence of reference                                                                                | Accession number | Consensus length | % Cover | % Identity |
|---------|-----------------------------------------|------------------------------------------------------------------------------------------------------|------------------|------------------|---------|------------|
| 1       | /                                       | /                                                                                                    | /                | /                | /       | /          |
|         | Sapelovirus                             | Sapelovirus A strain OPY-1-Corsica-2017 polyprotein gene, complete cds                               | MH513612         | 5,927            | 96      | 92.46      |
|         | Bocavirus                               | Porcine bocavirus strain G85-1AT-HU, complete genome                                                 | KF206167         | 3,507            | 100     | 97.08      |
| 2       | Bocavirus                               | Porcine bocavirus isolate GD11, complete genome                                                      | KM402139         | 3,507            | 100     | 91.82      |
|         | Bocavirus                               | Porcine bocavirus 3C isolate pig/ZJD/China/2006, complete genome                                     | JN681175         | 3,683            | 99      | 91.61      |
|         | Porcine Astrovirus                      | Mamastrovirus 3 isolate PAsV_GER_L00855-K14_14-04_2014 genome assembly, complete genome: monopartite | LT898434         | 1,508            | 52      | 90.88      |
| 3       | Sapelovirus                             | Sapelovirus A strain OPY-1-Corsica-2017 polyprotein gene, complete cds                               | MH513612         | 492              | 100     | 93.09      |
|         | Bocavirus                               | Porcine bocavirus strain CH/HNZM, complete genome                                                    | KX017193         | 2,105            | 99      | 97.22      |
|         | Porcine Astrovirus                      | Astrovirus wild boar/WBAstV-1/2011/HUN, complete genome                                              | JQ340310         | 428              | 100     | 91.59      |
| 4       | Porcine serum-associated circular virus | Porcine serum-associated circular virus isolate BR3, complete genome                                 | KU203353         | 531              | 86      | 86.33      |
|         | Enterovirus G                           | Enterovirus G isolate GER/F9-6/12-02-2013 polyprotein gene, partial cds                              | MF113376         | 956              | 100     | 86.72      |
|         | Sapelovirus                             | Porcine Sapelovirus isolate PSV_P1-3-3_Contig(g12h12) polyprotein gene, partial cds                  | KF705647         | 498              | 98      | 92.77      |
|         | Sapelovirus                             | Sapelovirus A strain OPY-1-Corsica-2017 polyprotein gene, complete cds                               | MH513612         | 1,687            | 100     | 92.12      |
|         | Sapelovirus                             | Sapelovirus A isolate HuN21 polyprotein gene, complete cds                                           | MF440649         | 1,230            | 100     | 86.59      |
|         | Sapelovirus                             | Sapelovirus A isolate PSV_GER_L00798-K11_14-02_2014 genome assembly, complete genome: monopartite    | LT900497         | 1,894            | 100     | 87.08      |
| 5       | Bocavirus                               | Porcine bocavirus strain 644-IDI-HR, complete genome                                                 | KF206161         | 4,580            | 100     | 95.28      |
|         | Bocavirus                               | Porcine bocavirus isolate GD11, complete genome                                                      | KM402139         | 4,580            | 100     | 95.09      |
|         | Porcine Astrovirus                      | Porcine astrovirus 2 clone KDC-6 ORF1ab gene, partial cds; and ORF2 gene, complete cds               | KJ495987         | 466              | 100     | 93.36      |
|         | Porcine Astrovirus                      | Porcine astrovirus 2 genes for ORF1ab, ORF1a, ORF2, complete cds, strain: PoAstV2/JPN/HgYa2-3/2015   | LC201588         | 422              | 100     | 87         |
|         | Porcine Astrovirus                      | Astrovirus wild boar/WBAstV-1/2011/HUN, complete genome                                              | JQ340310         | 533              | 100     | 90.81      |
|         | Porcine stool-associated circular virus | Porcine stool-associated circular virus 7 isolate EP2-B, complete genome                             | KJ577813         | 1,191            | 99      | 82.59      |
| 6       | Posavirus                               | Posavirus 1 isolate PsaV_GER_L01017-K01_15-07_2015 genome assembly, complete genome: monopartite     | LT898419         | 741              | 100     | 96.63      |
|         | Posavirus                               | Posavirus sp. isolate 12144_61, complete genome                                                      | KX673217         | 559              | 100     | 97.5       |
|         | Bocavirus                               | Porcine bocavirus 3 isolate IA159-3 NS1 and NP1 genes, complete cds; and VP1/VP2 gene, partial cds   | KF025387         | 491              | 100     | 84.85      |
|         | Porcine serum-associated circular virus | Porcine serum-associated circular virus isolate BR3, complete genome                                 | KU203353         | 929              | 99      | 86.03      |
| 7       | /                                       | /                                                                                                    | /                | /                | /       | /          |
| 8       | /                                       | /                                                                                                    | /                | /                | /       | /          |
| 9       | Circovirus                              | Circovirus sp. isolate PoCirV_VIRES_JL01_C5 capsid protein gene, partial cds                         | MK377643         | 1,038            | 100     | 85.17      |
|         | Circovirus                              | Circovirus sp. isolate PoCirV_VIRES_GX05_C4 replicase gene, partial cds                              | MK377558         | 639              | 64      | 89.54      |
|         | Porcine Astrovirus                      | Porcine astrovirus 2 genes for ORF1ab, ORF1a, ORF2, complete cds, strain: PoAstV2/JPN/Ishi-Ya4/2015  | LC201589         | 879              | 78      | 82.61      |
|         | Porcine Astrovirus                      | Porcine astrovirus 4 genes for ORF1ab, ORF1a, ORF2, complete cds, strain: PoAstV4/JPN/Bu5-10-2/2014  | LC201603         | 989              | 100     | 83.64      |
| 10      | Bocavirus                               | Porcine bocavirus 1 pig/ZJD/China/2006, complete genome                                              | HM053693         | 383              | 100     | 97.65      |
| 11      | Porcine Astrovirus                      | Porcine astrovirus 4 isolate 15-12, complete genome                                                  | KU764486         | 1,624            | 99      | 87.98      |
|         | Porcine Astrovirus                      | Porcine astrovirus 4 isolate 15-13, complete genome                                                  | KU764484         | 1,624            | 99      | 88.21      |
|         | Porcine stool-associated circular virus | Porcine stool-associated circular virus 7 isolate EP3-C, complete genome                             | KJ577814         | 719              | 100     | 86.77      |
| 12      | Posavirus                               | Posavirus sp. isolate 17668_12, complete genome                                                      | KX673279         | 1,606            | 93      | 85.53      |
|         | Posavirus                               | Posavirus sp. isolate 17668_13_2, complete genome                                                    | KX673281         | 1,546            | 100     | 85.52      |
| 13      | Porcine Astrovirus                      | Porcine astrovirus 4 strain JXJA, complete genome                                                    | KX060808         | 1,187            | 100     | 89.9       |

|    |                                         |                                                                                                       |          |       |     |       |
|----|-----------------------------------------|-------------------------------------------------------------------------------------------------------|----------|-------|-----|-------|
|    | Bocavirus                               | Porcine bocavirus 3 isolate IL330 NS1 and NP1 genes, complete cds; and VP1/VP2 gene, partial cds      | KF025394 | 483   | 100 | 96.48 |
| 14 | Porcine Astrovirus                      | Porcine astrovirus 4 strain 35/USA, complete genome                                                   | JF713713 | 1,798 | 100 | 90.12 |
|    | Porcine Astrovirus                      | Porcine astrovirus 4 strain CH/JXZS/2014, complete genome                                             | KX060809 | 1813  | 100 | 90.13 |
| 15 | Porcine Astrovirus                      | Mamastrovirus 3 isolate PoAstV_VIRES_HeB02_C4 ORF1ab and ORF1a genes, partial cds                     | MK378508 | 2,192 | 100 | 90.81 |
|    | Circovirus                              | Circovirus sp. isolate PoCirV_VIRES_SD02_C2 replicase gene, partial cds                               | MK377699 | 557   | 100 | 88.6  |
| 16 | Circovirus                              | Circovirus sp. isolate PoCirV_VIRES_HeB04_C3 capsid protein gene, partial cds                         | MK377607 | 777   | 100 | 90.27 |
| 17 | Porcine Astrovirus                      | Porcine astrovirus 4 genes for ORF1ab, ORF1a, ORF2, complete cds, strain: PoAstV/JPN/Mol2-1-2/2015    | LC201610 | 869   | 100 | 89.31 |
|    | Porcine Astrovirus                      | Porcine astrovirus 2 clone NZP-93_Subtype_2 ORF1ab gene, partial cds                                  | KJ495990 | 375   | 100 | 92.8  |
|    | Bocavirus                               | Porcine bocavirus 3 isolate IA13-1 VP1/VP2 gene, complete cds                                         | KF025484 | 931   | 100 | 94.13 |
|    | Porcine Astrovirus                      | Mamastrovirus 2 isolate U083, complete genome                                                         | KY940077 | 2,043 | 100 | 80.33 |
|    | Porcine Astrovirus                      | Mamastrovirus 3 isolate PoAstV_VIRES_GZ04_C10 ORF1ab and ORF1a genes, partial cds                     | MK378502 | 869   | 100 | 89.77 |
| 18 | Porcine Astrovirus                      | Porcine astrovirus 4 genes for ORF1ab, ORF1a, ORF2, complete cds, strain: PoAstV4/JPN/Ishi-Ya7-1/2015 | LC201613 | 1,970 | 91  | 89.22 |
|    | Porcine Astrovirus                      | Mamastrovirus 2 isolate U083, complete genome                                                         | KY940077 | 5,230 | 85  | 87.06 |
|    | Porcine Astrovirus                      | Mamastrovirus 3 isolate PAstV_GER_L00855-K14_14-04_2014 genome assembly, complete genome: monopartite | LT898434 | 4,050 | 100 | 85.87 |
| 19 | /                                       | /                                                                                                     | /        | /     | /   | /     |
| 20 | Sapelovirus                             | Sapelovirus A strain OPY-1-Corsica-2017 polyprotein gene, complete cds                                | MH513612 | 2,360 | 100 | 99.91 |
|    | Passivirus                              | Swine passivirus SPaV1/US/17-50816IA60467-1/2001 polyprotein gene, complete cds                       | MG674090 | 1,186 | 100 | 77.88 |
|    | Porcine stool-associated circular virus | Porcine serum-associated circular virus isolate BR2, complete genome                                  | KU203352 | 1,168 | 99  | 92.76 |
| 21 | /                                       | /                                                                                                     | /        | /     | /   | /     |
| 22 | Rotavirus                               | Porcine rotavirus B isolate PoRVB_VP2_VIRES_NM01_C2 VP2 gene, partial cds                             | MK379346 | 55    | 100 | 98.18 |
| 23 | /                                       | /                                                                                                     | /        | /     | /   | /     |
| 24 | Posavirus                               | Posavirus sp. isolate 17668_12, complete genome                                                       | KX673279 | 3,003 | 100 | 88.71 |
|    | Passivirus                              | Passivirus A isolate SPaV-A GER L01061-K07 15-03 2015 genome assembly, complete genome: monopartite   | LT898422 | 451   | 100 | 83.44 |
|    | Porcine stool-associated circular virus | Porcine stool-associated circular virus 7 isolate EP3-C, complete genome                              | KJ577814 | 702   | 100 | 83.25 |
| 25 | /                                       | /                                                                                                     | /        | /     | /   | /     |
| 26 | Posavirus                               | Posavirus sp. isolate 17668_13_2, complete genome                                                     | KX673281 | 1,282 | 99  | 89.31 |
|    | Posavirus                               | Posavirus 3 strain 10611 polyprotein gene, complete cds                                               | KT833079 | 860   | 100 | 94.07 |
|    | Posavirus                               | Posavirus strain 7048 polyprotein gene, partial cds                                                   | KT833076 | 1,121 | 99  | 87.92 |



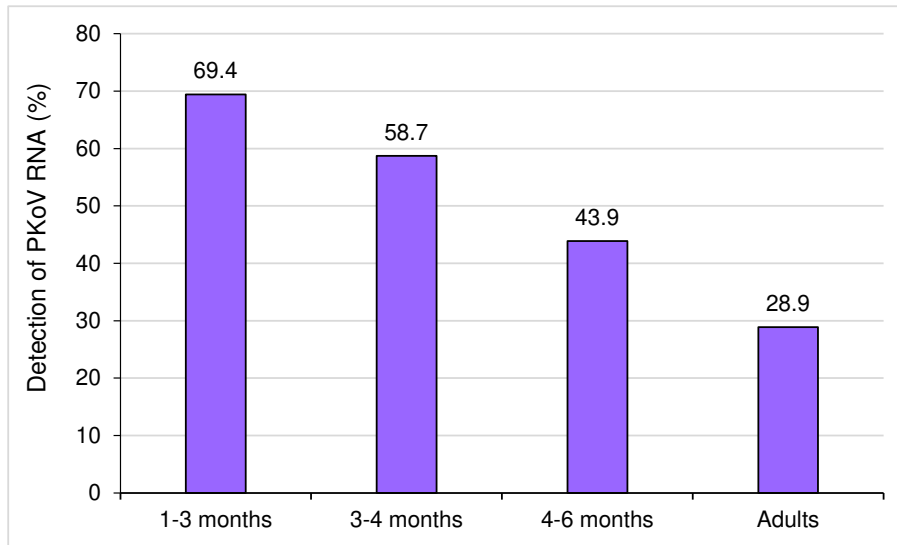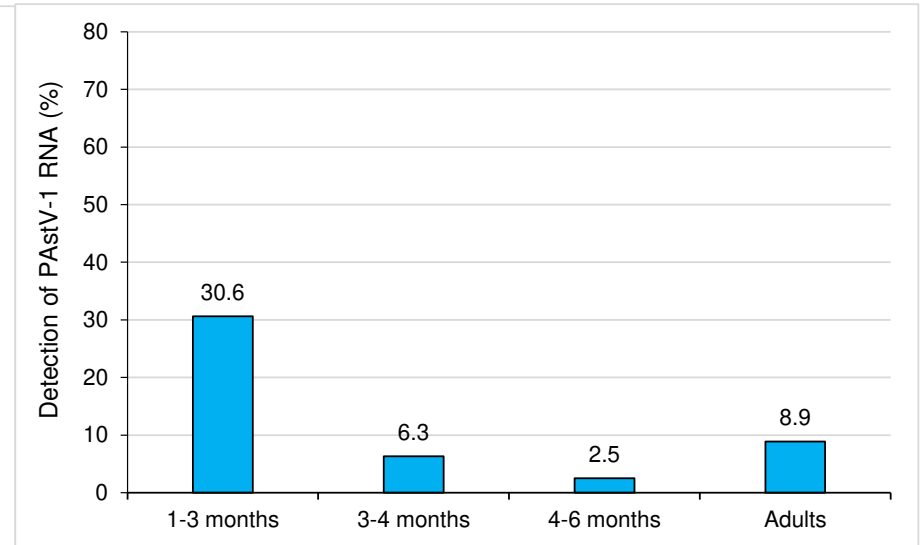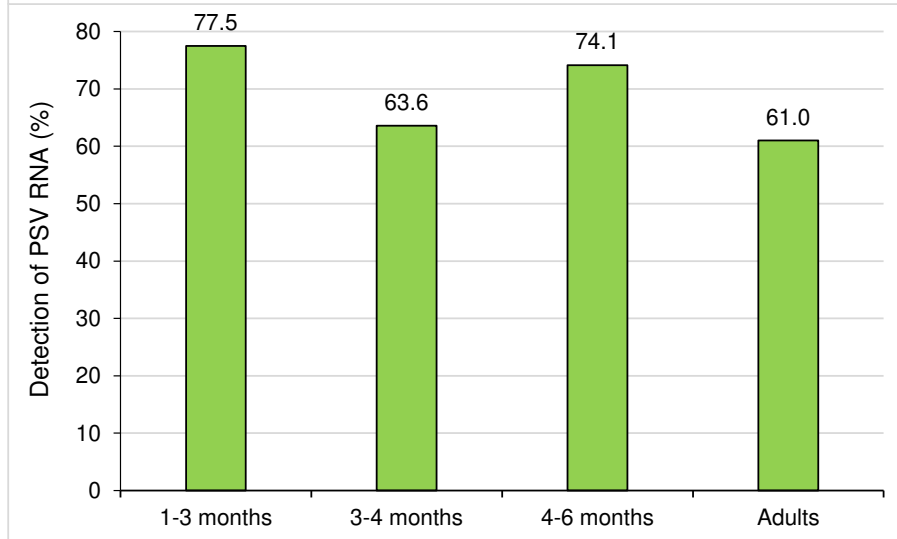

**Figure 1 Detection rate of each RNA virus by age group**
